# Supplementary material for: Enhanced Biomass Yield of and Saccharification in Transgenic Tobacco Over-Expressing β-Glucosidase
Source: MDPI journal article supplement (doi:10.3390/biom10050806), 2020-05-23
Supplement: s1 [file s1]

**Supplementary Table S1: Functional role of MDH (EC 1.1.1.37).**

| <b>Functional roles of MDH (EC 1.1.1.37)</b> |             |                                                         |            |
|----------------------------------------------|-------------|---------------------------------------------------------|------------|
|                                              | Plants      | Characteristic                                          | References |
| Knock-down                                   | Cotton      | Reduce 30% fresh biomass weight                         | [1]        |
|                                              | Arabidopsis | Reduce 50% biomass weight                               | [2]        |
|                                              | Tomato      | Reduce: 50% root length; 50% root dry weight            | [3]        |
| Overexpression                               | Cotton      | Increase 20% fresh biomass weight                       | [1]        |
|                                              | Alfalfa     | Increase 120% dry biomass weight; 100% roots dry weight | [4]        |
|                                              | Arabidopsis | Increase 70% dry biomass weight                         | [5]        |
|                                              | Tobacco     | Increase 20% fresh biomass weight; 50% root growth rate | [6]        |

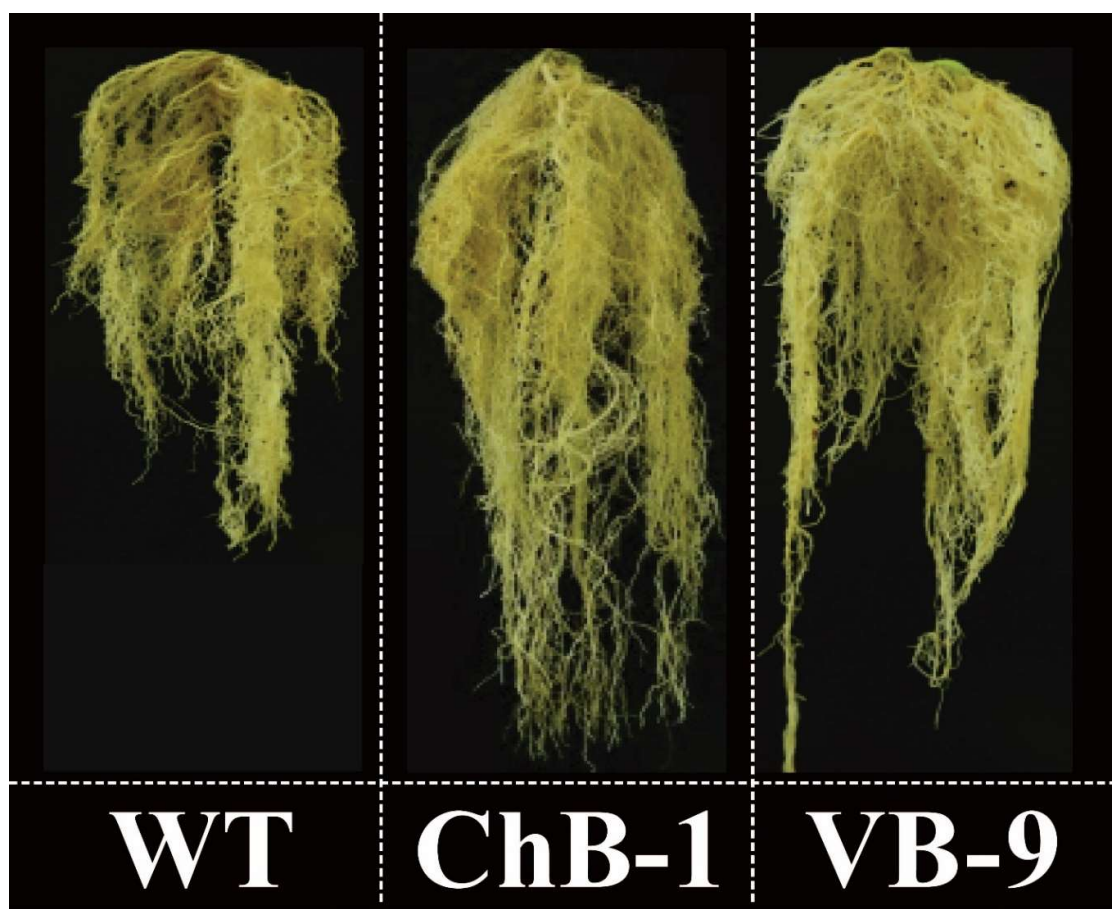

**Supplemental Figure S1.** Root development in the wild-type and T1 generation of transgenic tobacco plants overexpressing *T. maritima* BglB targeted to the chloroplasts and vacuoles after harvest.

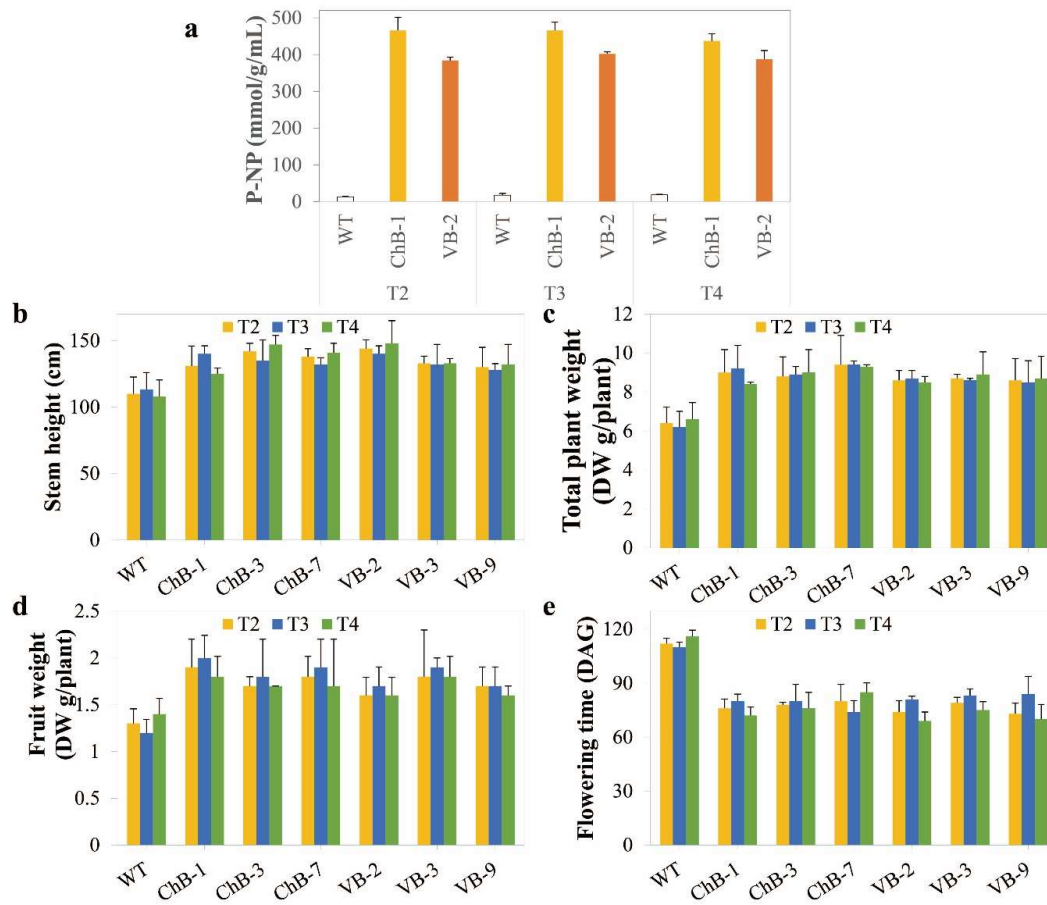

**Supplemental Figure S2.** (a)  $\beta$ -Glucosidase enzymatic activities and (b-e) phenotype characteristics of the wild-type and transgenic tobacco plants overexpressing *T. maritima* BglB targeted to the chloroplasts and vacuoles (T2 to T4 generations).

## mRNA transcriptional expression levels

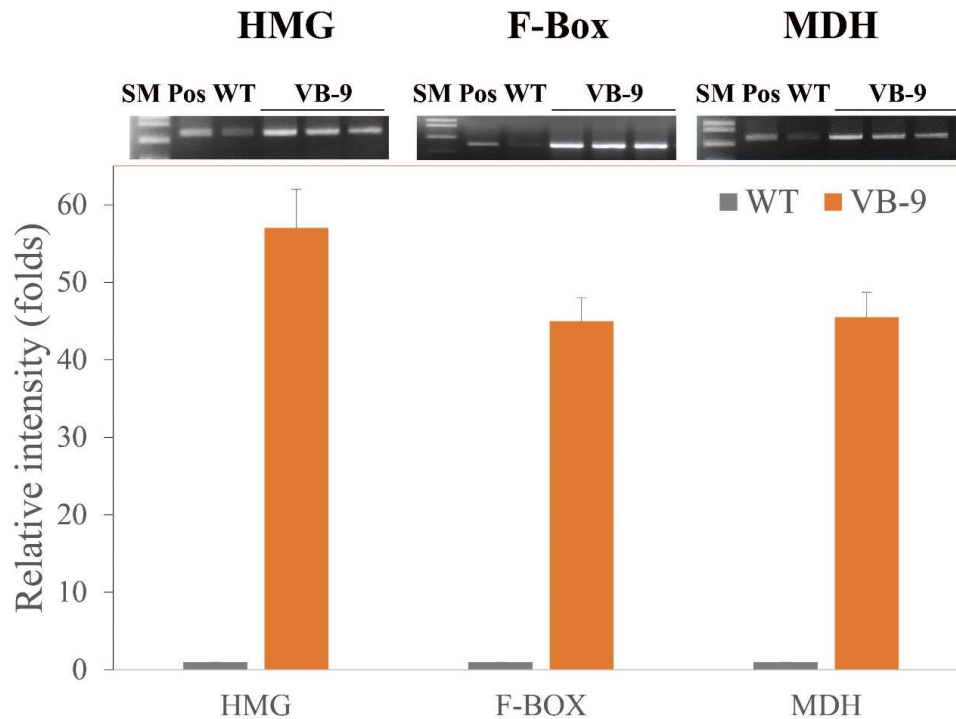

**Supplemental Figure S3.** Results of mRNA expression levels of HMG, F-Box, and MDH in the transgenic tobacco plants overexpressing *T. maritima* BglB targeted to the vacuole in comparison with those in the wild-type tobacco plants.

### References

1. Wang, Y.; Fan, C.; Hu, H.; Li, Y.; Sun, D.; Wang, Y.; Peng, L. Genetic modification of plant cell walls to enhance biomass yield and biofuel production in bioenergy crops. *Biotech. Adv.* **2016**, *34*, 997–1017.
2. Lindén, P.; Keech, O.; Stenlund, H.; Gardeström, P.; Moritz, T. Reduced mitochondrial malate dehydrogenase activity has a strong effect on photorespiratory metabolism as revealed by <sup>13</sup>C labelling. *Jour. Exp. Bot.* **2016**, *67*, 3123–3135.
3. van der Merwe, M.J.; Osorio, S.; Moritz, T.; Nunes-Nesi, A.; Fernie, A.R. Decreased mitochondrial activities of malate dehydrogenase and fumarase in tomato lead to altered root growth and architecture via diverse mechanisms. *Plant. Physio.* **2009**, *149*, 653–669.
4. Tesfaye, M.; Temple, S.J.; Allan, D.L.; Vance, C.P.; Samac, D.A. Overexpression of Malate Dehydrogenase in Transgenic Alfalfa Enhances Organic Acid Synthesis and Confers Tolerance to Aluminum. *Plant. Physio.* **2001**, *127*, 1836–1844.
5. Li, Q.-F.; Zhao, J.; Zhang, J.; Dai, Z.-H.; Zhang, L.-G. Ectopic Expression of the Chinese Cabbage Malate Dehydrogenase Gene Promotes Growth and Aluminum Resistance in Arabidopsis. *Front. Plant. Sci.* **2016**, *7*, 1180–1191.
6. Wang, Q.F.; Zhao, Y.; Yi, Q.; Li, K.Z.; Yu, Y.X.; Chen, L.M. Overexpression of malate dehydrogenase in transgenic tobacco leaves: Enhanced malate synthesis and augmented Al-resistance. *Act. Phys. Plan.* **2010**, *32*, 1209–1220.
